# Supplementary material for: Child mental health in Sierra Leone: a survey and exploratory qualitative study
Source: Springer Nature journal article supplement (doi:10.1186/s13033-016-0080-8), 2016-06-27
Supplement: MOESM1 [file 10289442]

## **Additional File 1 – Literature Review**

### **Methods**

**Keywords:** Sierra Leone, Psychosocial, Psychological, Child, Adolescent, Mental Health.

**Databases:** PubMed, PsycInfo, Pilots, Google Scholar. Other articles in the possession of the authors or supplied by key informants.

**Inclusion criteria:** (a) the study contains original data or is a systematic review, (b) it concerns a study population in Sierra Leone, (c) it focuses on mental health/psychosocial wellbeing and (d) it makes specific reference to children or adolescents (0-17 years).

Book Reviews, Editorials, Interviews, Conference Abstracts or News Items were excluded.

The included studies were published between January 2000 and October 2015.

**Results:** (see next page)

| General CAMH                              |                                                                                                                                                                               |                                                                                                                                                                         |   |  |  |      |                                                                                                                                                                                                                                                                                                 |                                                |
|-------------------------------------------|-------------------------------------------------------------------------------------------------------------------------------------------------------------------------------|-------------------------------------------------------------------------------------------------------------------------------------------------------------------------|---|--|--|------|-------------------------------------------------------------------------------------------------------------------------------------------------------------------------------------------------------------------------------------------------------------------------------------------------|------------------------------------------------|
| Children Associated with the Armed Forces |                                                                                                                                                                               |                                                                                                                                                                         |   |  |  |      |                                                                                                                                                                                                                                                                                                 |                                                |
| Children Affected by the Armed Conflict   |                                                                                                                                                                               |                                                                                                                                                                         |   |  |  |      |                                                                                                                                                                                                                                                                                                 |                                                |
|                                           |                                                                                                                                                                               |                                                                                                                                                                         |   |  |  | Both |                                                                                                                                                                                                                                                                                                 |                                                |
| 1                                         | Ardizzi*, Martina; Francesca Martini <sup>3</sup> , Maria Alessandra Umilta` <sup>1</sup> , Mariateresa Sestito <sup>1</sup> , Roberto Ravera <sup>3</sup> , Vittorio Gallese | When Early Experiences Build a Wall to Others' Emotions: An Electrophysiological Study                                                                                  | 1 |  |  |      | PLoS ONE 8(4): e61004. doi:10.1371/journal.pone.0061004                                                                                                                                                                                                                                         | Journal Article                                |
| 2                                         | Behrendt, Alice                                                                                                                                                               | Psychosocial needs of children without parental support in a post-conflict-area:A cross section study in the district of Kailahun in Sierra Leone                       |   |  |  | 1    |                                                                                                                                                                                                                                                                                                 | Research Report<br>Plan & FHI,<br>USAID, AWARE |
| 3                                         | Betancourt TS, Gilman SE, Brennan RT, Zahn I, VanderWeele TJ.                                                                                                                 | Identifying Priorities for Mental Health Interventions in War-Affected Youth: A Longitudinal Study                                                                      |   |  |  |      | 1 Pediatrics. 2015 Aug;136(2):e344-50. doi: 10.1542/peds.2014-1521. Epub 2015 Jul 6.                                                                                                                                                                                                            | Journal Article                                |
| 4                                         | Betancourt TS, McBain R, Newnham EA, Akinsulure-Smith AM, Brennan RT, Weisz JR, Hansen NB                                                                                     | A behavioral intervention for war-affected youth in Sierra Leone: a randomized controlled trial                                                                         |   |  |  |      | 1 J Am Acad Child Ad                                                                                                                                                                                                                                                                            | Journal Article                                |
| 5                                         | Betancourt TS, McBain R, Newnham EA, Brennan RT.                                                                                                                              | Trajectories of internalizing problems in war-affected Sierra Leonean youth: examining conflict and postconflict factors.                                               |   |  |  |      | 1 Child Dev. 2013 Mar-Apr;84(2):455-70                                                                                                                                                                                                                                                          | Journal Article                                |
| 6                                         | Betancourt TS, McBain R, Newnham EA, Brennan RT.                                                                                                                              | Context matters: community characteristics and mental health among war-affected youth in Sierra Leone.                                                                  |   |  |  | 1    | J Child Psychol Psychiatry. 2014 Mar;55(3):217-26. doi: 10.1111/jcpp.12131. Epub 2013 Sep 14                                                                                                                                                                                                    | Journal Article                                |
| 7                                         | Betancourt TS, McBain RK, Newnham EA, Brennan RT.                                                                                                                             | The intergenerational impact of war: longitudinal relationships between caregiver and child mental health in postconflict Sierra Leone.                                 |   |  |  | 1    | J Child Psychol Psychiatry. 2015 Oct;56(10):1101-7. doi: 10.1111/jcpp.12389. Epub 2015 Feb 9.                                                                                                                                                                                                   | Journal Article                                |
| 8                                         | Betancourt TS, Newnham EA, McBain R, Brennan RT                                                                                                                               | Post-traumatic stress symptoms among former child soldiers in Sierra Leone: follow-up study.                                                                            |   |  |  | 1    | Br J Psychiatry. 2013 Sep;203:196-202. Epub 2013 Jul 25                                                                                                                                                                                                                                         | Journal Article                                |
| 9                                         | Betancourt TS.                                                                                                                                                                | A Longitudinal Study of Psychosocial Adjustment and Community Reintegration among Former Child Soldiers in Sierra Leone.                                                |   |  |  | 1    | Int Psychiatry. 2010 Jul;7(3):60-62.                                                                                                                                                                                                                                                            | Journal Article                                |
| 10                                        | Betancourt, Theresa S                                                                                                                                                         | The impact of war on child development and mental health: A longitudinal study of risk and resilience among former child soldiers in Sierra Leone.                      |   |  |  | 1    | In: Patel, Deepali M [Ed]; Taylor, Rachel M [Ed]. Institute of Medicine; National Research Council of the National Academies. (2012). Social and economic costs of violence: Workshop summary. (pp. 88-97). xiii, 177 pp. Washington, DC, US: National Academies Press; US. [Book; Edited Book] | Book<br>chapter/worksh<br>op summary           |
| 11                                        | Betancourt, Theresa S.                                                                                                                                                        | The social ecology of resilience in war-affected youth: A longitudinal study from Sierra Leone.                                                                         |   |  |  |      | 1 In: Ungar, Michael [Ed]. (2012). The social ecology of resilience: A handbook of theory and practice. (pp. 347-356). xv, 463 pp. New York, NY, US: Springer Science + Business Media; US.                                                                                                     | Book Chapter                                   |
| 12                                        | Betancourt, Theresa S.; Agnew-Blais, Jessica; Gilman, Stephen E.; Williams, David R.; Ellis, B. Heidi                                                                         | Past horrors, present struggles: The role of stigma in the association between war experiences and psychosocial adjustment among former child soldiers in Sierra Leone. |   |  |  | 1    | Social Science & Medicine, Vol 70(1), Jan, 2010. pp. 17-26.                                                                                                                                                                                                                                     | Journal Article                                |

|    |                                                                                                                                                                                            |                                                                                                                                                           |  |   |   |                                                                                                                                                                                                                                    |                 |
|----|--------------------------------------------------------------------------------------------------------------------------------------------------------------------------------------------|-----------------------------------------------------------------------------------------------------------------------------------------------------------|--|---|---|------------------------------------------------------------------------------------------------------------------------------------------------------------------------------------------------------------------------------------|-----------------|
| 13 | Betancourt, Theresa S.; Borisova, Ivelina I.; de la Soudière, Marie; Williamson, John                                                                                                      | Sierra leone's child soldiers: War exposures and mental health problems by gender.                                                                        |  | 1 |   | Journal of Adolescent Health, Vol 49(1), Jul, 2011. pp. 21-28.                                                                                                                                                                     | Journal Article |
| 14 | Betancourt, Theresa S.; Brennan, Robert T.; Rubin-Smith, Julia; Fitzmaurice, Garrett M.; Gilman, Stephen E.                                                                                | Sierra Leone's former child soldiers: A longitudinal study of risk, protective factors and mental health.                                                 |  | 1 |   | Journal of the American Academy of Child & Adolescent Psychiatry, Vol 49(6), Jun, 2010. pp. 606-615.                                                                                                                               | Journal Article |
| 15 | Betancourt, Theresa S; McBain, Ryan K; Brennan, Robert T.                                                                                                                                  | Trajectories of externalizing problems among war-affected youth in Sierra Leone: Results from a longitudinal study                                        |  |   | 1 | Aggression and Violent Behavior. Vol.19(6), Nov 2014, pp. 708-714.                                                                                                                                                                 | Journal Article |
| 16 | Betancourt, Theresa S; Newnham, Elizabeth A; Hann, Katrina; McBain, Ryan K; Akinsulure-Smith, Adeyinka M; Weisz, John; Lilienthal, Grace M; Hansen, Nathan.                                | Addressing the consequences of violence and adversity: The development of a group mental health intervention for war-affected youth in Sierra Leone.      |  |   | 1 | In Book: Raynaud, Jean-Philippe [Ed]; Hodes, Matthew [Ed]; Gau, Susan Shur-Fen [Ed]. (2014). From research to practice in child and adolescent mental health. (pp. 157-177). xv, 256 pp. Lanham, MD, US: Rowman & Littlefield; US. | Book Chapter    |
| 17 | Betancourt, Theresa Stichick; Borisova, Ivelina Ivanova; Williams, Timothy Philip; Brennan, Robert T.; Whitfield, Theodore H.; de la Soudiere, Marie; Williamson, John; Gilman, Stephen E. | Sierra Leone's former child soldiers: A follow-up study of psychosocial adjustment and community reintegration.                                           |  | 1 |   | Child Development, Vol 81(4), Jul-Aug, 2010. pp. 1077-1095.                                                                                                                                                                        | Journal Article |
| 18 | Borisova, Ivelina I                                                                                                                                                                        | Child soldiers returning home from war: Family and caregiver impact on psychosocial reintegration.                                                        |  | 1 |   | Dissertation Abstracts International: Section B: The Sciences and Engineering, Vol 70(11-B), 2010. pp. 7200.                                                                                                                       | Dissertation    |
| 19 | Borisova, Ivelina Ivanova; Betancourt, Theresa Stichick; Willett, John B                                                                                                                   | Reintegration of former child soldiers in Sierra Leone: the role of caregivers and their awareness of the violence adolescents experienced during the war |  | 1 |   | Journal of Aggression, Maltreatment & Trauma, 22:8, 803-828                                                                                                                                                                        | Journal Article |
| 20 | Burman, ME, McKay S.                                                                                                                                                                       | Marginalization of girl mothers during reintegration from armed groups in Sierra Leone.                                                                   |  | 1 |   | Int Nurs Rev. 2007 Dec;54(4):316-23.                                                                                                                                                                                               | Journal Article |
| 21 | Clifton-Everest, Ian                                                                                                                                                                       | Meeting the mental health needs of children who have been associated with fighting forces: Some lessons from Sierra Leone.                                |  | 1 |   | In: Forced migration and mental health: Rethinking the care of refugees and displaced persons. Ingleby, David (Ed.); New York, NY, US: Springer Publishing Co, 2005. pp. 81-96.                                                    | Book Chapter    |
| 22 | Denov, M, C Gervais                                                                                                                                                                        | Negotiating (in) security: agency, resistance, and resourcefulness among girls formerly associated with Sierra Leone's Revolutionary United Front         |  | 1 |   | Signs: Journal of Women in Culture and Society 2007, vol. 32, no. 4                                                                                                                                                                | Journal Article |
| 23 | Denov, Myriam                                                                                                                                                                              | Coping with the trauma of war: Former child soldiers in post-conflict Sierra Leone.                                                                       |  | 1 |   | International Social Work, Vol 53(6), Nov, 2010. pp. 791-806.                                                                                                                                                                      | Journal Article |
| 24 | Denov, Myriam; Doucet, Denise; Kamara, A.                                                                                                                                                  | Engaging war affected youth through photography: Photovoice with former child soldiers in Sierra Leone.                                                   |  | 1 |   | Intervention. 10(2):117-133, July 2012.                                                                                                                                                                                            | Journal Article |
| 25 | Gupta, Leila; Zimmer, Catherine                                                                                                                                                            | Psychosocial intervention for war-affected children in Sierra Leone.                                                                                      |  | 1 |   | British Journal of Psychiatry, Vol 192(3), Mar, 2008. pp. 212-216.                                                                                                                                                                 | Journal Article |
| 26 | Harris DA.                                                                                                                                                                                 | Dance/movement therapy approaches to fostering resilience and recovery among African adolescent torture survivors.                                        |  |   | 1 | Torture. 2007;17(2):134-55.                                                                                                                                                                                                        | Journal Article |
| 27 | Harris, David Alan                                                                                                                                                                         | Pathways to embodied empathy and reconciliation after atrocity: Former boy soldiers in a dance/movement therapy group in Sierra Leone.                    |  | 1 |   | Intervention: International Journal of Mental Health, Psychosocial Work & Counselling in Areas of Armed Conflict, Vol 5(3), Nov, 2007. pp. 203-231.                                                                                | Journal Article |

|    |                                                                                                   |                                                                                                                                                                        |  |   |  |   |                                                                                                                                                                                                                                       |                 |
|----|---------------------------------------------------------------------------------------------------|------------------------------------------------------------------------------------------------------------------------------------------------------------------------|--|---|--|---|---------------------------------------------------------------------------------------------------------------------------------------------------------------------------------------------------------------------------------------|-----------------|
| 28 | Kline, Paul M. & Mone, Erin                                                                       | Coping with War: Three Strategies Employed by Adolescent Citizens of Sierra Leone                                                                                      |  |   |  | 1 | Child and Adolescent Social Work Journal, Vol. 20, No. 5, October 2003                                                                                                                                                                | Journal Article |
| 29 | McBain RK, Salhi C, Hann K, Salomon JA, Kim JJ, Betancourt TS                                     | Costs and cost-effectiveness of a mental health intervention for war-affected young persons: decision analysis based on a randomized controlled trial                  |  |   |  | 1 | Health Policy Plan. 2015 Sep 7. pii: czv078.                                                                                                                                                                                          | Journal Article |
| 30 | McKay, Susan; Veale, Angela; Worthen, Miranda; Wessells, Michael                                  | Building meaningful participation in reintegration among war-affected young mothers in Liberia, Sierra Leone and northern Uganda.                                      |  | 1 |  |   | Intervention: International Journal of Mental Health, Psychosocial Work & Counselling in Areas of Armed Conflict, Vol 9(2), Jul, 2011. pp. 108-124.                                                                                   | Journal Article |
| 31 | Medeiros, Emilie                                                                                  | Integrating mental health into post-conflict rehabilitation: The case of Sierra Leonean and Liberian 'child soldiers.'                                                 |  | 1 |  |   | Journal of Health Psychology, Vol 12(3), May, 2007. pp. 498-504.                                                                                                                                                                      | Journal Article |
| 32 | Murphy, William P                                                                                 | Child soldiers and community reconciliation in postwar Sierra Leone: African psychiatry in the twenty-first century.                                                   |  | 1 |  |   | In Book: Akyeamong, Emmanuel [Ed]; Hill, Allan G [Ed]; Kleinman, Arthur [Ed]. (2014). The culture of mental illness and psychiatric practice in Africa. (pp. 282-310). ix, 349 pp. Bloomington, IN, US: Indiana University Press; US. | Book Chapter    |
| 33 | Newnham, Elizabeth A; Pearson, Rebecca M; Stein, Alan; Betancourt, Theresa Stichick               | Youth mental health after civil war: the importance of daily stressors                                                                                                 |  |   |  | 1 | The British Journal of Psychiatry(2015)206, 116–121. doi: 10.1192/bjp.bp.114.146324                                                                                                                                                   | Journal Article |
| 34 | Poyrazli, Senel [Ed]; Thompson, Chalmer E [Ed].                                                   | International Case Studies in Mental Health                                                                                                                            |  | 1 |  |   | (2013). International case studies in mental health. xii, 238 pp. Thousand Oaks, CA, US: Sage Publications, Inc; US.                                                                                                                  | Book            |
| 35 | Shaw, Rosalind                                                                                    | The TRC, the NGO and the child: young people and post-conflict futures in Sierra Leone                                                                                 |  |   |  | 1 | Social AnthropologyAnthropologie Sociale(2014) 22, 3 306–325.                                                                                                                                                                         | Journal Article |
| 36 | Song S, van den Brink H, de Jong J.                                                               | Who cares for former child soldiers? Mental health systems of care in sierra leone.                                                                                    |  | 1 |  |   | Community Ment Health J. 2013 Oct;49(5):615-24. doi: 10.1007/s10597-013-9597-3. Epub 2013 Jan 22                                                                                                                                      | Journal Article |
| 37 | Stark, Lindsay                                                                                    | Cleansing the wounds of war: An examination of traditional healing, psychosocial health and reintegration in Sierra Leone.                                             |  | 1 |  |   | Intervention: International Journal of Mental Health, Psychosocial Work & Counselling in Areas of Armed Conflict, Vol 4(3), Nov, 2006. Special issue: Disarmament, demobilization and reintegration of child soldiers. pp. 206-218.   | Journal Article |
| 38 | Stark, Lindsay; Ager, Alastair; Wessells, Mike; Boothby, Neil                                     | Developing culturally relevant indicators of reintegration for girls, formerly associated with armed groups in Sierra Leone using a participative ranking methodology. |  | 1 |  |   | Intervention: International Journal of Mental Health, Psychosocial Work & Counselling in Areas of Armed Conflict, Vol 7(1), Mar, 2009. pp. 4-16.                                                                                      | Journal Article |
| 39 | Umilta, Maria Allessandra; Wood, Rachel; Loffredo, Francesca; Ravera, Roberto; Gallese, Vittorio. | Impact of civil war on emotion recognition: The denial of sadness in Sierra Leone.                                                                                     |  |   |  | 1 | Frontiers in Psychology. Vol.4 Sep 2013, ArtID 523.                                                                                                                                                                                   | Journal Article |
| 40 | Walker, Ashley                                                                                    | Using photovoice and participatory action research to identify factors which impede and promote health among orphans in Sierra Leone.                                  |  | 1 |  |   | Dissertation Abstracts International: Section B: The Sciences and Engineering, Vol 69(7-B), 2009. pp. 4126.                                                                                                                           | Dissertation    |

|    |                         |                                                                                                                                                                          |   |    |   |    |                                                                                                                                                                                                                                     |                 |      |
|----|-------------------------|--------------------------------------------------------------------------------------------------------------------------------------------------------------------------|---|----|---|----|-------------------------------------------------------------------------------------------------------------------------------------------------------------------------------------------------------------------------------------|-----------------|------|
| 41 | Williamson, John        | The disarmament, demobilization and reintegration of child soldiers: Social and psychological transformation in Sierra Leone.                                            |   | 1  |   |    | Intervention: International Journal of Mental Health, Psychosocial Work & Counselling in Areas of Armed Conflict, Vol 4(3), Nov, 2006. Special issue: Disarmament, demobilization and reintegration of child soldiers. pp. 185-205. | Journal Article | 2006 |
| 42 | Zack-Williams, Tunde B. | Child Soldiers in Sierra Leone and the Problems of Demobilisation, Rehabilitation and Reintegration into Society: Some Lessons for Social Workers in War-torn Societies. |   | 1  |   |    | Social Work Education, Vol 25(2), Mar, 2006. Special issue: Promoting Children's Well-Being. pp. 119-128.                                                                                                                           | Journal Article | 2006 |
|    |                         |                                                                                                                                                                          | 2 | 26 | 2 | 12 |                                                                                                                                                                                                                                     | 42              |      |
