# Supplementary material for: Child mental health in Sierra Leone: a survey and exploratory qualitative study
Source: Springer Nature journal article supplement (doi:10.1186/s13033-016-0080-8), 2016-06-27
Supplement: MOESM5 [file 10289442]

## INTERVIEW GUIDE TRADITIONAL HEALERS

| <b>1. GENERAL INFORMATION</b>                                    |  |
|------------------------------------------------------------------|--|
| 1.1 Name Traditional Healer                                      |  |
| 1.2 What is your official title?                                 |  |
| 1.3 How many years have you been practicing traditional healing? |  |
| 1.4 How did you learn to practice traditional healing?           |  |
| 1.5 Geographical Location                                        |  |
| 1.6 Date & Time of Visit                                         |  |
| 1.7 Interviewer                                                  |  |

| <b>2. FREQUENCY OF CHILD/ADOLESCENT CONSULTATIONS</b>                                                                                                                                                                                                                                                                                                                                                                                                     |
|-----------------------------------------------------------------------------------------------------------------------------------------------------------------------------------------------------------------------------------------------------------------------------------------------------------------------------------------------------------------------------------------------------------------------------------------------------------|
| <b>2.1 Children (0-11 years)</b>                                                                                                                                                                                                                                                                                                                                                                                                                          |
| In your healing practice, how frequent are children (0-11 years) brought in for help?<br><input type="radio"/> Never<br><input type="radio"/> About one child per week<br><input type="radio"/> More than one child per week (approximate number of cases per week: ____)<br><input type="radio"/> About one child per month<br><input type="radio"/> More than one child per month (approximate number of cases per month: ____)                         |
| <b>2.2 Adolescents (12-17 years)</b>                                                                                                                                                                                                                                                                                                                                                                                                                      |
| In your healing practice, how frequent are adolescents (12-17 years) brought in for help?<br><input type="radio"/> Never<br><input type="radio"/> About one adolescent per week<br><input type="radio"/> More than one adolescent per week (approximate number of cases per week: ____)<br><input type="radio"/> About one adolescent per month<br><input type="radio"/> More than one adolescent per month (approximate number of cases per month: ____) |

| <b>3. SPECIFIC CASE INFORMATION CHILDREN</b>                                       |  |
|------------------------------------------------------------------------------------|--|
| Let's talk about the younger children (0-11 years) first:                          |  |
| For what kind of problems may children be brought to you?                          |  |
| How do you find out what their problems are?                                       |  |
| What are common causes for the problems they have?                                 |  |
| What help do you usually offer them?<br>Probe for procedures and use of artefacts. |  |

|                                                                                                   |  |
|---------------------------------------------------------------------------------------------------|--|
| What is the role of the child in the healing process?                                             |  |
| What is the role of the parents/guardians in the healing process?                                 |  |
| What payment is usually required for a consultation?                                              |  |
| <b>NB: If an interesting, specific disorder is mentioned, go to ... for additional questions.</b> |  |

|                                                                                                 |  |
|-------------------------------------------------------------------------------------------------|--|
| <b>4. SPECIFIC CASE INFORMATION ADOLESCENTS</b>                                                 |  |
| Now let's talk about the older children (12-17 years):                                          |  |
| For what kind of problems may these older children be brought to you?                           |  |
| How do you find out what their problems are?                                                    |  |
| What are common causes for the problems they have?                                              |  |
| What help do you usually offer them?<br>Probe for procedures and use of artefacts.              |  |
| In the case of older children, what is the role of the child in the healing process?            |  |
| What is the role of the parents/guardians in the healing process?                               |  |
| What payment is usually required for a consultation?                                            |  |
| <b>NB: If an interesting, specific disorder is mentioned, go to 7 for additional questions.</b> |  |

|                                                                                                                                                                       |                                                                                                                                                                                                                                                                                                                                                                                                                                 |
|-----------------------------------------------------------------------------------------------------------------------------------------------------------------------|---------------------------------------------------------------------------------------------------------------------------------------------------------------------------------------------------------------------------------------------------------------------------------------------------------------------------------------------------------------------------------------------------------------------------------|
| <b>5. REFERRALS</b>                                                                                                                                                   |                                                                                                                                                                                                                                                                                                                                                                                                                                 |
| There might be times when you decide to advise the child/adolescent and its caregivers to (also) go somewhere else for help. Can you tell me where you may send them? | <input type="checkbox"/> Health Services (e.g. doctors, hospitals, clinics, pharmacies)<br><input type="checkbox"/> School / Teachers<br><input type="checkbox"/> Social Services (e.g. Ministry of Social Welfare)<br><input type="checkbox"/> NGO's or CBO's working with children & adolescents<br><input type="checkbox"/> Churches or Christian Healing Ministries<br><input type="checkbox"/> Other, please specify _____ |

## 6. IF THE CHILD DOESN'T GET BETTER

Sometimes children/adolescents do not get well despite the help that is offered. What do you think could be reasons for this?

What do you usually do in this situation?

## 7. PROBING QUESTIONS FOR SPECIFIC PROBLEMS

### Problem 1:

How do you recognise this problem?

What are the causes for this problem?

What kind of help do you offer for this problem?

Is the child/adolescent usually healed?  
Immediately or over time?

### Problem 2:

How do you recognise this problem?

What are the causes for this problem?

What kind of help do you offer for this problem?

Is the child/adolescent usually healed?  
Immediately or over time?

### Problem 3:

How do you recognise this problem?

What are the causes for this problem?

What kind of help do you offer for this problem?

Is the child/adolescent usually healed?  
Immediately or over time?

## **8. PROBING QUESTIONS FOR DISSOCIATION (IF APPROPRIATE)**

Have you seen children/adolescents whose behaviour or voice suddenly changes as if they become another person (or an animal) and after a while they change back into their usual selves again?

What, in your opinion, causes this problem?

What help do you offer in such cases?

\*) Partly based on/adapted from "Assessing Mental Health and Psychosocial Needs and Resources: Toolkit for Major Humanitarian Crises." WHO: Draft Version, May 2011.
