# Supplementary material for: Child mental health in Sierra Leone: a survey and exploratory qualitative study
Source: Springer Nature journal article supplement (doi:10.1186/s13033-016-0080-8), 2016-06-27
Supplement: MOESM7 [file 10289442]

## Interview Parents

|                                             |  |
|---------------------------------------------|--|
| <b>Details Child</b>                        |  |
| Sex:                                        |  |
| Age:                                        |  |
| Any Physical Disability:                    |  |
| Probable Diagnosis according to Researcher: |  |

- How old was your child when you first suspected your child had some sort of problem?
- What did you do when you noticed this?
- Did you seek help? Where/from whom?
- What did they say about the problem of your child? What help did they give?
- Did you have to pay? How much?
- Has it helped you or your child? In what way?
- How do people around you (family/community) treat your child?
- What do they say about him/her? What words do they use to describe him/her?
- What do they say about *you*? Do they help you in any way?
- Is your child going to school? If not, why not?
- Do you think the government should do something for children like your child? If yes, what?
- What are your thoughts about the future of your child?
